# Supplementary material
Source: MDPI journal article supplement (https://www.mdpi.com/2076-3298/11/2/37)
Supplement: s1 [file s1]

## Supporting information

### Supplementary Materials and Methods

#### Microcosm Experiment

The Ria de Aveiro is a shallow estuarine coastal lagoon with a mean depth of  $\approx 1$  m but with a deeper central channel that accesses the port infrastructures. It is influenced by freshwater, through the various rivers that drain there, and by the ocean with which it communicates through a single artificial channel. Collected sediment cores were immediately placed into individual glass microcosms (glass tanks of 25, 28, and 12.4 cm in height, length, and width, respectively, and with a headspace volume of  $\approx 3$  L) and transferred directly to the Experimental Life Support System (ELSS). A semidiurnal tidal regime emptied the microcosms in  $\approx 1$  min and filled them with recently prepared synthetic seawater at a renewal rate of about 50% of the total water volume. The diurnal light cycle was programmed with light intensity varying between 50 and 100%. The temperature of the sediment cores was maintained at 19 °C by immersion in a refrigerated water bath (Seachill TR10, Teco S.R.L., Italy). Synthetic seawater was prepared by dissolving a commercial salt mixture (Tropic Marin Pro Reef salt – Tropic Marine, Germany) in freshwater purified by a four-stage reverse-osmosis unit (Aqua-win RO-6080 - Aqua-win, Taiwan), and salinity was adjusted to  $\approx 32$  ppt as measured through a refractometer (V2 Refractometer - Tropic Marine, Germany).

Seven and twenty organisms (all adult and at the same stage of development) of *Hediste diversicolor* and *Peringia ulvae*, respectively, were collected from the field (on the same date and location) and added to the sediment natural populations of each microcosm to increase the number of individuals for DNA and biochemical marker analyses (see below). Collected organisms were immediately transported to the laboratory and transferred to the ELSS. Dead organisms registered during the acclimatization period were discarded, and replaced by new individuals which were collected from the same sampling location. Organisms that died during the experimental period were neither collected nor replaced.

#### Biochemical Markers Assay

The activity of acetylcholinesterase (AChE) was assessed by using acetylthiocholine iodide as a substrate and, according to Ellman et al., (1961), adapted to microplate by monitoring the absorbance (414 nm) of the

5,5'-dithiobis(2-nitrobenzoic acid) reaction with thiocholine every 20 s over 5 min ( $\epsilon_{412} = 1.36 \times 10^4 \text{ M}^{-1} \text{ cm}^{-1}$ ). The AChE activity is expressed as nmol of substrate hydrolysed per min per protein.

The activity of lactate dehydrogenase (LDH) was evaluated by monitoring at 340 nm (every 20 s, during 5 min) the decrease of NADH ( $\epsilon_{340} = 6.3 \text{ mM}^{-1} \text{ cm}^{-1}$ ) due to its oxidation. This was conducted as per the Vassault (1983) protocol adapted to a microplate (Diamantino et al., 2001) and was expressed as nmol of substrate hydrolysed per min per mg of protein.

The activity of catalase (CAT) was monitored by following the decrease in absorbance at 240 nm derived from the consumption of  $\text{H}_2\text{O}_2$  ( $\epsilon_{240} = 40 \text{ M}^{-1} \text{ cm}^{-1}$ ) and recorded every 10 s for 2 min (Clairborne, 1985). The CAT activity is expressed as  $\mu\text{mol}$  of hydrolysed  $\text{H}_2\text{O}_2$  per min per mg protein.

The activity of glutathione *S*-transferase (GST) was measured according to Habig et al. (1974) and monitored every 20 s for 5 min at 340 nm. The GST activity is expressed as nmol of the conjugated substrate (GSH plus 2,4-dinitrochlorobenzene) per min per mg protein ( $\epsilon_{340} = 9.6 \times 10^3 \text{ M}^{-1} \text{ cm}^{-1}$ ).

The quantification of lipid peroxidation (LPO) was carried out according to Ohkawa et al. (1979) with adjustments, being expressed as pmol of thiobarbituric acid-reactive substances (TBARS) hydrolysed per mg of soft tissue fresh weight (FW) ( $\epsilon_{535} = 1.56 \times 10^5 \text{ M}^{-1} \text{ cm}^{-1}$ ).

All of the above enzymatic activity analyses and LPO quantifications were determined spectrophotometrically in a microplate reader (Multiskan Spectrum, Thermo Fisher Scientific, USA). For LPO quantification and each enzymatic activity monitoring, all determinations were, respectively, done in triplicate and quadruplicate in 96-well microplates at 25 °C. After thawing on ice, all samples were homogenized through sonication (Sonifier S-250A, Branson Ultrasonics, USA); pulse intensity and duration were adjusted to each particular species—*H. diversicolor* and *P. ulvae*) in an ice-water bath, and specific homogenization buffers were used for the respective assayed enzymes (AChE: 0.1 M K-phosphate, pH 7.2; LDH: 0.1 M Tris-NaCl, pH 7.2; CAT: 0.05 M K-phosphate, pH 7.0; GST: 0.1 M K-phosphate, pH 6.5).

Except for LPO, all the measurements described above were normalized to protein concentration, which was determined at 595 nm according to Bradford (1976), with the Bio-Rad® dye-binding micro-assay adapted for 96-well microplates. Bovine  $\gamma$ -globulin was used as standard.

The protocols for the determination of energy-related parameters were adapted from De Coen and Janssen (2003), with slight modifications for the microplate reader. Briefly, soft tissue samples of *H. diversicolor* or *P. ulvae* were kept on ice and homogenized (Sonifier S-150A, Branson Ultrasonics) in ultrapure water (50 mg soft tissue: 1 mL<sup>-1</sup> ultrapure water). Three aliquots of 300  $\mu\text{L}$  were taken from each replicate for the analysis of total lipids, total carbohydrates, total proteins, and electron transport system (ETS) activity. Total

lipids were extracted by centrifugation of the aliquots with a mixture of 500  $\mu\text{L}$  of chloroform (119.38 M; ACS spectrophotometric grade,  $\geq 99.8\%$ ) and 500  $\mu\text{L}$  of methanol (32.04 M; ACS spectrophotometric grade,  $\geq 99.8\%$ ). The organic phase of each sample was transferred to clean glass tubes and acidified with 500  $\mu\text{L}$  of  $\text{H}_2\text{SO}_4$ . The absorbance was measured at 345 nm and tripalmitin was used as a standard. In the second aliquot of homogenized samples, proteins were precipitated with 100  $\mu\text{L}$  of 15% trichloroacetic acid, followed by 10 min of incubation at  $-20^\circ\text{C}$ . After centrifugation ( $1000 \times g$  for 10 min at  $4^\circ\text{C}$ ), the supernatant was collected and used for total carbohydrate quantification. For this purpose, all samples and standards of glucose were incubated ( $20^\circ\text{C}$ , 30 min) with 5% phenol plus  $\text{H}_2\text{SO}_4$ , and the absorbance was monitored at 492 nm. The pellets were then resuspended in 500  $\mu\text{L}$  of NaOH, incubated ( $60^\circ\text{C}$ , 30 min), and neutralized with 280  $\mu\text{L}$  of HCl. Total protein content was quantified according to Bradford (1976) (Bradford, 1976) at 592 nm by using bovine serum albumin as standard. To convert the energy available ( $E_a$ ; as per sum of total lipids, carbohydrates, and proteins) into the respective energetic equivalent values, the corresponding energy of combustion ( $39,500 \text{ mJ g}^{-1}$  lipid;  $17,500 \text{ mJ g}^{-1}$  glycogen;  $24,000 \text{ mJ g}^{-1}$  protein) was used (De Coen and Janssen, 2003). Total lipids, total carbohydrates, total protein contents, and  $E_a$  were expressed as  $\text{mJ mg}^{-1}$  FW.

The homogenate for the determination of energy consumption ( $E_c$ ; measured as ETS activity) was processed by adding 150  $\mu\text{L}$  of homogenization buffer [0.3 M Tris base, 0.45% (w/v) polyvinylpyrrolidone,  $459 \mu\text{M}$   $\text{MgSO}_4$ , 0.6% (v/v) Triton X-100, pH 8.5], and centrifuged ( $1000 \times g$ , 10 min  $4^\circ\text{C}$ ). The resulting supernatant was transferred to a 96-well microplate, and 150  $\mu\text{L}$  of a buffered solution [0.13 M Tris base, 0.27% (v/v) Triton X-100, 1.7 mM NADH,  $274 \mu\text{M}$  NADPH, 100  $\mu\text{L}$  of INT (*p*-iodonitrotetrazolium; 8 mM)] was added before measurement (absorbance kinetically monitored at 490 nm, for 3 min). The conversion of the oxygen consumption rate was based on the stoichiometric relationship, whereby 1  $\mu\text{mol}$  of oxygen is consumed for every 2  $\mu\text{mol}$  of formed formazan. The quantity of oxygen consumed was determined by the formula of Lambert–Beer ( $A = \epsilon \times l \times c$ , where  $A$  = absorbance;  $\epsilon$  for INT-formazan =  $15,900 \text{ M cm}^{-1}$ ;  $l$  = 0.9 cm; and  $c$  = oxygen consumed in M). The  $E_c$  values were obtained by converting to energetic values by using the specific oxyenthalpic equivalent for an average lipid, carbohydrate, and protein mixture of  $480 \text{ kJ mol}^{-1} \text{ O}_2$ . The obtained values were divided by the FW of organisms and the results were expressed as  $\text{mJ mg}^{-1} \text{ FW h}^{-1}$ . The sum of total lipids, total carbohydrates, and total proteins constitutes the  $E_a$ , and the correspondent cellular energy allocation (CEA) ratio was computed as  $\text{CEA} = E_a/E_c$  (Verslycke et al., 2003).

## Data analysis

Evenness (Pielou's J) index was calculated by dividing Shannon's H' by the number of ASVs in each sample. Significant differences in community diversity were tested with an analysis of deviance using the `glm()` function in 'stats' (R Core Team, 2020). A number of these variables included an excess of zero counts in the samples, and, therefore, we set the family argument to 'tweedie' (Dunn, 2017) using the `tweedie()` function in 'tweedie' with `var.power=1.5` and `link.power=0` (a compound Poisson–gamma distribution). Using the generalized-linear model (GLM), significant variations among factors and their interaction (pH\*Oil) were tested for significance using the `anova()` function. The relative abundance of selected prokaryotic higher taxa and most abundant ASVs (50 most abundant) were tested for significant differences among factors and their interaction (pH\*Oil) with an analysis of deviance, using the `glm()` function with the family argument set to `quasibinomial`.

For compositional analyses, the ASV table in the present report was transformed using the `ordinate()` function in 'phyloseq' (McMurdie and Holmes, 2013). First, a `phyloseq` object was generated using the `phyloseq()` function; the input for the function included the ASV table, taxonomic metadata for the ASV table, and metadata for each sample. The `ordinate()` function in 'phyloseq' was subsequently used with the `phyloseq` object as input, the method argument set to 'PCoA', and the distance argument set to 'bray'. A biplot was then produced using the `plot_ordination()` function with the type argument set to 'biplot'. In addition to producing PCoA ordinations for the full dataset, separate ordinations were also produced for samples from each organism (gastropod, polychaete). The BLAST search tool (<http://www.ncbi.nlm.nih.gov/>) was used to compare representative sequences of the top 50 most abundant ASVs of each organism with sequences in the NCBI nucleotide collection (nr/nt) database using standard parameter settings (Altschul et al., 1990). Sequences that exhibited the highest levels of similarity to our data were considered to be the closest related organisms.

Variations among factors were tested for significance for each biochemical marker in each model organism dataset through a permutational multivariate analysis of variance (PERMANOVA) using the `adonis()` function in the `vegan` package in R. The number of permutations was set at 999; all other arguments used the default values set in the function.

## Supporting tables

**Table S1** – Description of the factorial treatments in the microcosm experiment.

| Acronym     | Treatment  | Oil added? | pH altered? | Description                                                     | Observations                                                                                                      |
|-------------|------------|------------|-------------|-----------------------------------------------------------------|-------------------------------------------------------------------------------------------------------------------|
| <b>Cont</b> | Control    | No         | No          | No oil added and no acidification of seawater pH                | None                                                                                                              |
| <b>OnpH</b> | Only pH    | No         | Yes         | No oil added and seawater pH was acidified with CO <sub>2</sub> | None                                                                                                              |
| <b>OnOi</b> | Only Oi    | Yes        | No          | Oil added and no acidification of seawater pH                   | None                                                                                                              |
| <b>pHOi</b> | pH and Oil | Yes        | Yes         | Oil added and seawater was acidified with CO <sub>2</sub>       | For <i>P. ulvae</i> , this treatment was removed because it lacked organisms from at least three tank-replicates. |

**Table S2** – Results of analysis of variance (ANOVA) of evenness, richness, Shannon, and Fisher diversity indices of the *Peringia ulvae* (gastropod)-associated bacterial communities. Coef: coefficient; Df: degrees of freedom; Resid.Df: residual degrees of freedom; Resid.Dev: residual deviance; F: *f*-value; P: *p*-value; Sig: significance. Note the absence of the pH0i treatment.

| Model    | Coef | Df | Deviance | Resid.Df | Resid.Dev | F     | P     | Sig |
|----------|------|----|----------|----------|-----------|-------|-------|-----|
| Evenness | NULL |    |          | 8        | 0.008     |       |       |     |
|          | pH   | 1  | 0.000    | 7        | 0.008     | 0.064 | 0.809 |     |
|          | Oil  | 1  | 0.003    | 6        | 0.006     | 2.756 | 0.148 |     |
| Richness | NULL |    |          | 8        | 11.074    |       |       |     |
|          | pH   | 1  | 0.795    | 7        | 10.279    | 0.657 | 0.449 |     |
|          | Oil  | 1  | 2.853    | 6        | 7.426     | 2.357 | 0.176 |     |
| Shannon  | NULL |    |          | 8        | 0.060     |       |       |     |
|          | pH   | 1  | 0.005    | 7        | 0.055     | 1.279 | 0.301 |     |
|          | Oil  | 1  | 0.032    | 6        | 0.023     | 8.457 | 0.027 | *   |
| Fisher   | NULL |    |          | 8        | 5.933     |       |       |     |
|          | pH   | 1  | 0.254    | 7        | 5.679     | 0.353 | 0.574 |     |
|          | Oil  | 1  | 1.309    | 6        | 4.371     | 1.822 | 0.226 |     |

Note: \*  $p < 0.05$ .

**Table S3** – Results of analysis of variance (ANOVA) for evenness, richness, Shannon, and Fisher diversity indices of the *Hediste diversicolor* (polychaete)-associated bacterial communities. Coef: coefficient; Df: degrees of freedom; Resid.Df: residual degrees of freedom; Resid.Dev: residual deviance; F: *f*-value; P: *p*-value; Sig: significance.

| Model    | Coef   | Df | Deviance | Resid.Df | Resid.Dev | F     | P     | Sig |
|----------|--------|----|----------|----------|-----------|-------|-------|-----|
| Evenness | NULL   |    |          | 11       | 0.606     |       |       |     |
|          | pH     | 1  | 0.088    | 10       | 0.518     | 1.777 | 0.219 |     |
|          | Oil    | 1  | 0.018    | 9        | 0.499     | 0.371 | 0.559 |     |
|          | pH:Oil | 1  | 0.085    | 8        | 0.415     | 1.712 | 0.227 |     |
| Richness | NULL   |    |          | 11       | 35.283    |       |       |     |
|          | pH     | 1  | 4.236    | 10       | 31.047    | 1.293 | 0.288 |     |
|          | Oil    | 1  | 3.033    | 9        | 28.014    | 0.926 | 0.364 |     |
|          | pH:Oil | 1  | 1.056    | 8        | 26.958    | 0.322 | 0.586 |     |
| Shannon  | NULL   |    |          | 11       | 1.662     |       |       |     |
|          | pH     | 1  | 0.334    | 10       | 1.328     | 2.987 | 0.122 |     |
|          | Oil    | 1  | 0.101    | 9        | 1.227     | 0.901 | 0.370 |     |
|          | pH:Oil | 1  | 0.272    | 8        | 0.955     | 2.430 | 0.158 |     |
| Fisher   | NULL   |    |          | 11       | 19.578    |       |       |     |
|          | pH     | 1  | 2.951    | 10       | 16.626    | 1.663 | 0.233 |     |
|          | Oil    | 1  | 1.311    | 9        | 15.315    | 0.738 | 0.415 |     |
|          | pH:Oil | 1  | 0.571    | 8        | 14.744    | 0.322 | 0.586 |     |

**Table S4:** Results of the PERMANOVA for polychaete (*Hediste diversicolor*)- and gastropod (*Peringia ulvae*)-associated bacterial communities. Coef: coefficient; Df: degrees of freedom; SumsOfSqs: sum of squares; MeanSqs: mean squares; F: *f*-value; P: *p*-value; Sig: significance.

| Model      | Coef      | Df | SumsOfSqs | MeanSqs | F     | R <sup>2</sup> | P     | Sig |
|------------|-----------|----|-----------|---------|-------|----------------|-------|-----|
| Polychaete | pH        | 1  | 0.238     | 0.238   | 0.863 | 0.078          | 0.720 |     |
|            | Oil       | 1  | 0.348     | 0.348   | 1.261 | 0.114          | 0.089 |     |
|            | pH:Oil    | 1  | 0.255     | 0.255   | 0.925 | 0.084          | 0.574 |     |
|            | Residuals | 8  | 2.206     | 0.276   |       | 0.724          |       |     |
|            | Total     | 11 | 3.047     |         |       | 1.000          |       |     |
| Gastropod  | pH        | 1  | 0.276     | 0.276   | 1.616 | 0.160          | 0.053 |     |
|            | Oil       | 1  | 0.419     | 0.419   | 2.459 | 0.244          | 0.001 | *** |
|            | Residuals | 6  | 1.023     | 0.170   |       | 0.596          |       |     |
|            | Total     | 8  | 1.718     |         |       | 1.000          |       |     |

Note: \*\*\*  $p < 0.001$ .



**Table S5:** Mean relative abundance and standard deviation of the four most abundant phyla and orders in the dataset. Control: control treatment, i.e., without oil and with normal pH; OnpH: only pH treatment, i.e., without oil and with reduced seawater pH; OnOi: only oil treatment, i.e., with oil and with normal seawater pH; pHOi: pH and oil treatment, i.e., with oil and with reduced seawater pH.

| Rank   | Taxa                    | Gastropod ( <i>Peringia ulvae</i> ) |              |              |               | Polychaete ( <i>Hediste diversicolor</i> ) |               |               |               |
|--------|-------------------------|-------------------------------------|--------------|--------------|---------------|--------------------------------------------|---------------|---------------|---------------|
|        |                         | Cont                                | OnpH         | OnOi         | OipH          | Cont                                       | OnpH          | OnOi          | OipH          |
| Phylum | <i>Proteobacteria</i>   | 48.39 ± 6.63                        | 54.2 ± 6.14  | 69.16 ± 4.28 | 31.46 ± 38.79 | 42.98 ± 7.71                               | 38.28 ± 25.39 | 44.16 ± 17.33 | 46.34 ± 18.12 |
|        | <i>Cyanobacteria</i>    | 1.08 ± 0.12                         | 2.35 ± 2.97  | 0.44 ± 0.69  | 0.54 ± 0.76   | 2.32 ± 3.93                                | 30.48 ± 36.82 | 0.15 ± 0.17   | 0.64 ± 1.03   |
|        | <i>Planctomycetota</i>  | 12.11 ± 3.95                        | 14.24 ± 1.23 | 8.98 ± 1.89  | 8.32 ± 10.64  | 11.59 ± 1.72                               | 5.13 ± 2.79   | 15.24 ± 8.33  | 9.91 ± 4.44   |
|        | <i>Bacteroidota</i>     | 31.20 ± 5.29                        | 25.05 ± 2.71 | 12.63 ± 4.88 | 25.73 ± 9.27  | 0.75 ± 0.58                                | 0.39 ± 0.3    | 0.23 ± 0.02   | 0.94 ± 1.37   |
| Order  | <i>Rhodobacterales</i>  | 34.28 ± 5.35                        | 35.4 ± 7.62  | 35.19 ± 7.6  | 16.13 ± 21.08 | 4.84 ± 0.82                                | 2.34 ± 1.15   | 11.76 ± 7.34  | 5.14 ± 2.15   |
|        | <i>Cyanobacteriales</i> | 0.6 ± 0.43                          | 0.32 ± 0.39  | 0.4 ± 0.62   | 0.03 ± 0.04   | 2.3 ± 3.92                                 | 30.42 ± 36.86 | 0.05 ± 0.05   | 0.59 ± 1.02   |
|        | <i>Pirellulales</i>     | 7.38 ± 2.24                         | 8.73 ± 1.93  | 4.19 ± 1.65  | 4.41 ± 6.08   | 10.23 ± 1.39                               | 4.34 ± 2.25   | 11.67 ± 7.44  | 8.23 ± 3.30   |
|        | <i>Chitinophagales</i>  | 27.26 ± 5.89                        | 18.19 ± 1.33 | 7.06 ± 2.51  | 4.87 ± 6.56   | 0.08 ± 0.07                                | 0.01 ± 0.01   | 0.04 ± 0.02   | 0.03 ± 0.05   |

**Table S6:** Results of the ANOVA of Proteobacteria, Cyanobacteria, Planctomycetota, and Bacteroidota abundances of the polychaete (*Hediste diversicolor*)-associated bacterial communities. Coef: coefficient; Df: degrees of freedom; Resid.Df: residual degrees of freedom; Resid.Dev: residual deviance; F: *f*-value; P: *p*-value; Sig: significance.

| Model                  | Coef   | Df | Deviance  | Resid.Df | Resid.Dev  | F      | P     | Sig |
|------------------------|--------|----|-----------|----------|------------|--------|-------|-----|
| <i>Proteobacteria</i>  | NULL   |    |           | 11       | 34564.889  |        |       |     |
|                        | pH     | 1  | 613.964   | 10       | 33950.924  | 0.172  | 0.689 |     |
|                        | Oil    | 1  | 3184.485  | 9        | 30766.439  | 0.892  | 0.372 |     |
|                        | pH:Oil | 1  | 1744.169  | 8        | 29022.271  | 0.489  | 0.504 |     |
| <i>Cyanobacteria</i>   | NULL   |    |           | 11       | 174885.422 |        |       |     |
|                        | pH     | 1  | 66618.802 | 10       | 108266.620 | 15.338 | 0.004 | *   |
|                        | Oil    | 1  | 67544.386 | 9        | 40722.234  | 15.551 | 0.004 | *   |
|                        | pH:Oil | 1  | 32.810    | 8        | 40689.424  | 0.008  | 0.933 |     |
| <i>Planctomycetota</i> | NULL   |    |           | 11       | 19166.883  |        |       |     |
|                        | pH     | 1  | 7649.737  | 10       | 11517.146  | 10.193 | 0.013 |     |
|                        | Oil    | 1  | 3841.560  | 9        | 7675.586   | 5.119  | 0.054 |     |
|                        | pH:Oil | 1  | 1192.557  | 8        | 6483.029   | 1.589  | 0.243 |     |
| <i>Bacteroidota</i>    | NULL   |    |           | 11       | 2000.308   |        |       |     |
|                        | pH     | 1  | 17.162    | 10       | 1983.147   | 0.063  | 0.807 |     |
|                        | Oil    | 1  | 10.583    | 9        | 1972.564   | 0.039  | 0.848 |     |
|                        | pH:Oil | 1  | 275.057   | 8        | 1697.507   | 1.017  | 0.343 |     |

Note: \*P < 0.0125 (Bonferroni-corrected  $\alpha$  value).

**Table S7:** Results of the permutational analysis of variance (PERMANOVA) for Proteobacteria, Cyanobacteria, Planctomycetota, and Bacteroidota abundances of the gastropod (*Peringia ulvae*)-associated bacterial communities. Coef: coefficient; Df: degrees of freedom; Resid.Df: residual degrees of freedom; Resid.Dev: residual deviance; F: *f*-value; P: *p*-value; Sig: significance.

| Model                  | Coef | Df | Deviance | Resid.Df | Resid.Dev | F      | P     | Sig |
|------------------------|------|----|----------|----------|-----------|--------|-------|-----|
| <i>Proteobacteria</i>  | NULL |    |          | 8        | 3602.381  |        |       |     |
|                        | pH   | 1  | 600.587  | 7        | 3001.794  | 4.017  | 0.092 |     |
|                        | Oil  | 1  | 2104.263 | 6        | 897.531   | 14.073 | 0.009 | *   |
| <i>Cyanobacteria</i>   | NULL |    |          | 8        | 6251.024  |        |       |     |
|                        | pH   | 1  | 2954.086 | 7        | 3296.939  | 6.745  | 0.041 |     |
|                        | Oil  | 1  | 361.985  | 6        | 2934.954  | 0.827  | 0.398 |     |
| <i>Planctomycetota</i> | NULL |    |          | 8        | 2212.046  |        |       |     |
|                        | pH   | 1  | 728.009  | 7        | 1484.037  | 4.817  | 0.071 |     |
|                        | Oil  | 1  | 584.399  | 6        | 899.637   | 3.867  | 0.097 |     |
| <i>Bacteroidota</i>    | NULL |    |          | 8        | 9503.683  |        |       |     |
|                        | pH   | 1  | 912.356  | 7        | 8591.327  | 2.715  | 0.151 |     |
|                        | Oil  | 1  | 6601.033 | 6        | 1990.294  | 19.642 | 0.004 | *   |

Note: \*P < 0.0125 (Bonferroni-corrected  $\alpha$  value).

**Table S8:** Results of analysis of variance (ANOVA) of Rhodobacterales, Cyanobacteriales, Pirellulales, and Chitinophagales abundances of the polychaete (*Hediste diversicolor*)-associated bacterial communities. Coef: coefficient; Df: degrees of freedom; Resid.Df: residual degrees of freedom; Resid.Dev: residual deviance; F: *f*-value; P: *p*-value; Sig: significance.

| Model                   | Coef   | Df | Deviance  | Resid.Df | Resid.Dev  | F      | P     | Sig |
|-------------------------|--------|----|-----------|----------|------------|--------|-------|-----|
| <i>Rhodobacterales</i>  | NULL   |    |           | 11       | 16670.869  |        |       |     |
|                         | pH     | 1  | 6174.364  | 10       | 10496.505  | 12.053 | 0.008 | *   |
|                         | Oil    | 1  | 5805.465  | 9        | 4691.040   | 11.333 | 0.010 | *   |
|                         | pH:Oil | 1  | 32.499    | 8        | 4658.541   | 0.063  | 0.807 |     |
| <i>Cyanobacteriales</i> | NULL   |    |           | 11       | 176412.217 |        |       |     |
|                         | pH     | 1  | 66992.289 | 10       | 109419.928 | 15.375 | 0.004 | *   |
|                         | Oil    | 1  | 68315.927 | 9        | 41104.000  | 15.679 | 0.004 | *   |
|                         | pH:Oil | 1  | 2.591     | 8        | 41101.409  | 0.001  | 0.981 |     |
| <i>Pirellulales</i>     | NULL   |    |           | 11       | 15798.006  |        |       |     |
|                         | pH     | 1  | 5861.830  | 10       | 9936.176   | 8.445  | 0.020 |     |
|                         | Oil    | 1  | 2316.263  | 9        | 7619.913   | 3.337  | 0.105 | *   |
|                         | pH:Oil | 1  | 1311.876  | 8        | 6308.037   | 1.890  | 0.206 |     |
| <i>Chitinophagales</i>  | NULL   |    |           | 11       | 138.911    |        |       |     |
|                         | pH     | 1  | 26.875    | 10       | 112.036    | 1.802  | 0.216 |     |
|                         | Oil    | 1  | 4.717     | 9        | 107.319    | 0.316  | 0.589 |     |
|                         | pH:Oil | 1  | 4.828     | 8        | 102.491    | 0.324  | 0.585 |     |

Note: \*P < 0.0125 (Bonferroni-corrected  $\alpha$  value).

**Table S9:** Results of analysis of variance (ANOVA) of Rhodobacterales, Cyanobacterales, Pirellulales, and Chitinophagales abundances of the gastropod (*Peringia ulvae*)-associated bacterial communities. Coef: coefficient; Df: degrees of freedom; Resid.Df: residual degrees of freedom; Resid.Dev: residual deviance; F: *f*-value; P: *p*-value; Sig: significance.

| Model                  | Coef | Df | Deviance  | Resid.Df | Resid.Dev | F      | P      | Sig |
|------------------------|------|----|-----------|----------|-----------|--------|--------|-----|
| <i>Rhodobacterales</i> | NULL |    |           | 8        | 2660.193  |        |        |     |
|                        | pH   | 1  | 110.776   | 7        | 2549.417  | 0.264  | 0.626  |     |
|                        | Oil  | 1  | 2.907     | 6        | 2546.510  | 0.007  | 0.936  |     |
| <i>Cyanobacterales</i> | NULL |    |           | 8        | 1421.375  |        |        |     |
|                        | pH   | 1  | 11.355    | 7        | 1410.020  | 0.048  | 0.834  |     |
|                        | Oil  | 1  | 33.845    | 6        | 1376.174  | 0.144  | 0.718  |     |
| <i>Pirellulales</i>    | NULL |    |           | 8        | 3186.633  |        |        |     |
|                        | pH   | 1  | 983.070   | 7        | 2203.564  | 5.301  | 0.061  |     |
|                        | Oil  | 1  | 1094.173  | 6        | 1109.391  | 5.900  | 0.051  |     |
| <i>Chitinophagales</i> | NULL |    |           | 8        | 13194.793 |        |        |     |
|                        | pH   | 1  | 497.394   | 7        | 12697.399 | 2.096  | 0.198  |     |
|                        | Oil  | 1  | 11226.659 | 6        | 1470.740  | 47.311 | 0.0004 | *   |

Note: \*P < 0.0125 (Bonferroni-corrected  $\alpha$  value).

**Table S10:** List of the 50 most abundant bacterial amplicon sequence variants (ASVs) associated with the polychaete *Hediste diversicolor*. The table includes the ASV numbers (ASV), and the taxonomic assignment at the family and genus levels was performed by using the SILVA database (<https://www.arb-silva.de>). Seq. ID: BLAST sequence ID of a close match with our ASV sequence; Seq. sim: sequence similarity; Source/Context: source of these organisms.

| ASV | Family                     | Genus                              | Seq. ID     | Seq. sim | Source/Context                                                                                     |
|-----|----------------------------|------------------------------------|-------------|----------|----------------------------------------------------------------------------------------------------|
| 1   | Cyanobacteriaceae          | Unclassified                       | KF624242.1  | 100%     | Suboxic pyrite-particle colonization experiment; Janssand tidal flat at Wadden Sea                 |
| 2   | Endozoicomonadaceae        | <i>Endozoicomonas</i>              | AY494615.1  | 100%     | Salmonid gill                                                                                      |
| 3   | Unclassified               | Unclassified                       | KU353777.1  | 88.80%   | <i>Galaxea fascicularis</i>                                                                        |
| 4   | Clostridiaceae             | <i>Clostridium sensu stricto 2</i> | NR 115712.1 | 98.80%   | <i>Clostridium hydrogeniformans</i> - Contaminated groundwater by chloroethanes and other solvents |
| 7   | Thiotrichaceae             | <i>Thiothrix</i>                   | KP948979.1  | 99.20%   | <i>Penaeus vannamei</i>                                                                            |
| 8   | Rhodobacteraceae           | Unclassified                       | CP054599.1  | 100%     | Shallow sea; symbiosis with algae                                                                  |
| 11  | Desulfocapsaceae           | Uncultured                         | HE803922.1  | 100%     | Marine seabed sediments                                                                            |
| 12  | Burkholderiaceae           | <i>Ralstonia</i>                   | MT565488.1  | 100%     | Biodegradation of diethyl-phthalate by halotolerant bacteria in estuarine sediment                 |
| 13  | Clostridiaceae             | <i>Clostridium sensu stricto 2</i> | NR 115712.1 | 99.20%   | <i>Clostridium hydrogeniformans</i> - Contaminated groundwater by chloroethanes and other solvents |
| 17  | Clostridiaceae             | <i>Clostridium sensu stricto 2</i> | KX967682.1  | 97.19%   | Tropical urban freshwater                                                                          |
| 18  | Pirellulaceae              | <i>Rhodopirellula</i>              | MK554582.1  | 100%     | <i>Stieleria varia</i>                                                                             |
| 19  | Desulfosarcinaceae         | Sva0081 sediment group             | JQ199040.1  | 100%     | Seawater                                                                                           |
| 21  | Endozoicomonadaceae        | <i>Endozoicomonas</i>              | AY494615.1  | 99.60%   | Salmonid gill                                                                                      |
| 22  | Cyanobacteriaceae          | Unclassified                       | MF508061.1  | 100%     | Intertidal microbial mats/sediment                                                                 |
| 23  | Endozoicomonadaceae        | <i>Endozoicomonas</i>              | AY494615.1  | 99.60%   | Salmonid gill                                                                                      |
| 24  | Uncultured                 | uncultured <i>Thioalkalivibrio</i> | MG637622.1  | 100%     | Near-surface sediments                                                                             |
| 25  | Rhizobiales Incertae Sedis | <i>Andersenella</i>                | KP948621.1  | 100%     | Shrimp/Intestinal flora                                                                            |
| 28  | Chromatiaceae              | <i>Candidatus Thiobios</i>         | MF581677.1  | 100%     | Hydrocarbon contaminated sites                                                                     |
| 31  | Desulfocapsaceae           | Uncultured                         | MG638511.1  | 100%     | Marine Sediment                                                                                    |
| 34  | Unclassified               | Uncultured bacterium               | KY891873.1  | 100%     | Soil                                                                                               |
| 39  | Desulfovibrionaceae        | <i>Halodesulfovibrio</i>           | LC490621.1  | 100%     | Deep-sea methane seep sediment                                                                     |
| 41  | Pirellulaceae              | <i>Rubripirellula</i>              | MK559976.1  | 100%     | <i>Planctomycetes</i> bacterium                                                                    |
| 42  | Chromatiaceae              | <i>Candidatus Thiobios</i>         | JF344427.1  | 100%     | Hydrocarbon polluted marine sediments                                                              |
| 44  | Methyloligellaceae         | <i>Methyloceanibacter</i>          | MH091214.1  | 100%     | Mangrove sediments                                                                                 |

|     |                        |                           |             |        |                                                                         |
|-----|------------------------|---------------------------|-------------|--------|-------------------------------------------------------------------------|
| 45  | Hyphomicrobiaceae      | <i>Filomicrobium</i>      | MH091208.1  | 100%   | Mangrove. sediment during anaerobic debromination of PBDEs              |
| 46  | Desulfosarcinaceae     | Sva0081 sediment group    | KY276786.1  | 100%   | Southern Korean coastal waters                                          |
| 48  | Ectothiorhodospiraceae | <i>Thiogramum</i>         | KX422144.1  | 100%   | Hydrothermal sulphur vent microbial mats                                |
| 52  | Chromatiaceae          | Unclassified              | KF512938.1  | 100%   | Pink berry consortia / microscale sulphur cycling                       |
| 55  | Rhodobacteraceae       | <i>Sulfitobacter</i>      | MK660323.1  | 100%   | Antarctic sponge                                                        |
| 56  | Rhodobacteraceae       | Unclassified              | MF992419.1  | 100%   | Lake water                                                              |
| 61  | Run-SP154              | Run-SP154                 | JF774695.1  | 100%   | Impact of oil on bacterial community structure in bioturbated sediments |
| 62  | Desulfocapsaceae       | Uncultured                | MF968105.1  | 100%   | Paddy soil                                                              |
| 64  | Milano-WF1B-44         | Milano-WF1B-44            | KY277845.1  | 100%   | Dinoflagellate <i>Cochlodinium</i>                                      |
| 72  | Rhizobiaceae           | Unclassified              | KY277500.1  | 100%   | Dinoflagellate <i>Cochlodinium</i>                                      |
| 74  | Peptostreptococcaceae  | <i>Romboutsia</i>         | MN646982.1  | 100%   | Sediment                                                                |
| 77  | Methyloiligellaceae    | <i>Methyloceanibacter</i> | AB806486.1  | 100%   | Ocean drilling core sample                                              |
| 80  | Arenicellaceae         | Unclassified              | JF774699.1  | 100%   | Impact of oil on bacterial community structure in bioturbated sediments |
| 81  | Sedimenticolaceae      | Uncultured                | GU197440.1  | 100%   | <i>Tubificoides benedii</i>                                             |
| 82  | HOC36                  | HOC36                     | MG638519.1  | 100%   | Marine sediment                                                         |
| 89  | Thiotrichaceae         | <i>Thiothrix</i>          | KP948979.1  | 100%   | <i>Penaeus vannamei</i>                                                 |
| 92  | Pirellulaceae          | <i>Ilumatobacter</i>      | KT880452.1  | 97.61% | Hymeniacidon heliophila                                                 |
| 93  | B2M28                  | B2M28                     | KT017836.1  | 100%   | Heavy metal contaminated soil                                           |
| 98  | Sedimenticolaceae      | Uncultured                | HQ191099.1  | 100%   | Dangast muddy intertidal sediment                                       |
| 102 | Sedimenticolaceae      | Uncultured                | KU676710.1  | 100%   | Surface coastal water                                                   |
| 105 | Desulfocapsaceae       | Unclassified              | KU675538.1  | 100%   | Surface coastal water                                                   |
| 107 | Rhodobacteraceae       | Unclassified              | LR722717.1  | 100%   | Coastal marine surface water                                            |
| 110 | Desulfosarcinaceae     | <i>Desulfosarcina</i>     | NR 044680.2 | 100%   | <i>Desulfosarcina variabilis</i>                                        |
| 113 | Unclassified           | Unclassified              | HM032657.1  | 100%   | <i>Trichodesmium erythraeum</i>                                         |
| 116 | Desulfosarcinaceae     | Sva0081 sediment group    | AY374976.1  | 100%   | Salt marsh sediment                                                     |
| 121 | Desulfocapsaceae       | Uncultured                | KY276689.1  | 100%   | Southern Korean coastal waters                                          |

**Table S11:** List of the 50 most abundant bacterial amplicon sequence variants (ASVs) associated with the gastropod *Peringia ulvae*. The table includes the ASV numbers (ASV), and the taxonomic assignment at the family and genus levels was performed by using the SILVA database (<https://www.arb-silva.de>). Seq. ID: BLAST sequence ID of a close match with our ASV sequence; Seq. sim: sequence similarity; Source/Context: source of these organisms.

| ASV | Family                    | Species/organism          | Seq. ID     | Seq. sim | Source/Context                                                   |
|-----|---------------------------|---------------------------|-------------|----------|------------------------------------------------------------------|
| 5   | <i>Porticoccaceae</i>     | <i>Porticoccus</i>        | KU382363.1  | 100%     | Bay Pomme d'Or Louisiana                                         |
| 6   | <i>Saprospiraceae</i>     | Uncultured                | JQ236019.1  | 100%     | <i>Cladocora caespitosa</i> skeleton naturally exposed to pH 8.1 |
| 8   | <i>Rhodobacteraceae</i>   | Unclassified              | CP054599.1  | 100%     | Shallow sea symbiosis with algae                                 |
| 10  | <i>Rhodobacteraceae</i>   | Unclassified              | MH061217.1  | 100%     | Carapace of <i>Cancer pagurus</i>                                |
| 14  | <i>Rhodobacteraceae</i>   | Unclassified              | LR722720.1  | 100%     | Coastal marine surface water                                     |
| 15  | <i>Rhodobacteraceae</i>   | Unclassified              | MF195218.1  | 100%     | Shrimp intestine                                                 |
| 16  | <i>Rubinisphaeraceae</i>  | <i>Fuerstia</i>           | HM437309.1  | 100%     | Surface of thriving-algae collected at peak-bloom period         |
| 18  | <i>Pirellulaceae</i>      | <i>Rhodopirellula</i>     | KX213868.1  | 100%     | Macroalgae                                                       |
| 20  | <i>Rhodobacteraceae</i>   | Unclassified              | MK967063.1  | 100%     | <i>Aurita medusa</i> Baltic Sea husbandry                        |
| 26  | <i>Granulosicoccaceae</i> | <i>Granulosicoccus</i>    | JQ579712.1  | 99.60%   | Oil-polluted subtidal sediments                                  |
| 27  | <i>Saprospiraceae</i>     | <i>Lewinella</i>          | KT979445.1  | 100%     | Marine intertidal outcrops/endolithic community of Mono Island   |
| 29  | <i>Rhodobacteraceae</i>   | Unclassified              | JN232290.1  | 100%     | Seagrass epiphytic biofilm                                       |
| 30  | <i>Rhodobacteraceae</i>   | Unclassified              | EU346516.1  | 99.60%   | Marine sponge                                                    |
| 32  | <i>Saprospiraceae</i>     | <i>Phaeodactylibacter</i> | KP945312.1  | 98.40%   | Shrimp intestine                                                 |
| 33  | <i>Alcalinovoracaceae</i> | <i>Alcanivorax</i>        | MN186614.1  | 100%     | <i>Alcanivorax borkumensis</i>                                   |
|     |                           |                           | MH595649.1  | 100%     | <i>Lessonia trabeculata</i>                                      |
| 36  | <i>Rhodobacteraceae</i>   | Unclassified              | HQ441219.1  | 99.60%   | <i>Fucus vesiculosus</i>                                         |
| 38  | <i>Rhodobacteraceae</i>   | Unclassified              | AJ968650.1  | 100%     | Intertidal sediment                                              |
| 40  | <i>Rhodobacteraceae</i>   | Unclassified              | NR 163664.1 | 100%     | Tidal flat sediment                                              |
| 43  | <i>Rhodobacteraceae</i>   | Unclassified              | MT484146.1  | 100%     | <i>Hymeniacidon perlevis</i> (Marine sponge)                     |
| 49  | <i>Saprospiraceae</i>     | Uncultured                | KY277423    | 98.40%   | Dinoflagellate <i>Cochlodinium polykrikoides</i> blooms          |
| 50  | <i>Rhodobacteraceae</i>   | Unclassified              | JX984082.1  | 100%     | Biofilm age on settlement of <i>Mytilus edulis</i>               |
| 51  | <i>Saprospiraceae</i>     | Uncultured                | MK175881.1  | 100%     | Coral tissue mucus and skeleton                                  |
| 53  | <i>Rhodobacteraceae</i>   | Unclassified              | MF581839.1  | 100%     | <i>Holothuria arguinensis</i> (sea cucumber)                     |
| 54  | <i>Rhodobacteraceae</i>   | Unclassified              | MK967052.1  | 100%     | <i>Aurita medusa</i> Baltic Sea husbandry                        |
| 57  | <i>Rhodobacteraceae</i>   | Unclassified              | HM171150.1  | 100%     | Marine bacterial community in the presence of Prestige fuel oil  |



|    |                         |                        |            |        |                                                            |
|----|-------------------------|------------------------|------------|--------|------------------------------------------------------------|
| 58 | <i>Rhodobacteraceae</i> | Unclassified           | KP949962.1 | 99.2%  | <i>Penaeus vannamei</i>                                    |
| 59 | <i>Rhodobacteraceae</i> | Unclassified           | MN267475.1 | 100%   | <i>Loktanella</i> sp.                                      |
| 60 | <i>Rhodobacteraceae</i> | Unclassified           | KX602047.1 | 98.80% | Surface sea water                                          |
| 63 | <i>Saprospiraceae</i>   | Uncultured             | KY277107.1 | 100%   | Dinoflagellate <i>Cochlodinium polykrikoides</i> blooms    |
| 65 | <i>Saprospiraceae</i>   | <i>Lewinella</i>       | MK588934.1 | 100%   | Gut microbiome of <i>Litopenaeus vannamei</i>              |
| 66 | <i>Pirellulaceae</i>    | <i>Blastopirellula</i> | KF185446.1 | 98.80% | Uncultured marine bacterium                                |
| 67 | OM190                   | OM190                  | MK559991.1 | 100%   | <i>Planctomycetes</i> bacterium                            |
| 68 | <i>Saprospiraceae</i>   | <i>Lewinella</i>       | EU371935.1 | 100%   | <i>Lewinella persica</i>                                   |
| 70 | <i>Saprospiraceae</i>   | <i>Lewinella</i>       | EU371937.1 | 100%   | <i>Lewinella cohaerens</i>                                 |
| 75 | <i>Saprospiraceae</i>   | Uncultured             | MN890266.1 | 100%   | Marine recirculation aquaculture system                    |
| 76 | <i>Saprospiraceae</i>   | <i>Lewinella</i>       | KY276469.1 | 100%   | Dinoflagellate <i>Cochlodinium</i>                         |
| 78 | <i>Rhodobacteraceae</i> | Unclassified           | KY770426.1 | 100%   | Phycosphere <i>Synechococcus</i> -bacteria interactions    |
| 79 | <i>Rhodobacteraceae</i> | <i>Marivita</i>        | MN746209.1 | 100%   | Isolates in the coastal dinoflagellate bloom               |
| 83 | <i>Rhodobacteraceae</i> | Unclassified           | MH773428.1 | 100%   | <i>Roseobacter</i> sp.                                     |
| 84 | <i>Myxococcaceae</i>    | P3OB-42                | MN890217.1 | 98.80% | Marine recirculation aquaculture system                    |
| 85 | <i>Arenicellaceae</i>   | HTCC5015               | JX391735.1 | 99.20% | Marine sediment                                            |
| 86 | <i>Rhodobacteraceae</i> | Unclassified           | KP262766.1 | 100%   | Surface seawater                                           |
| 87 | <i>Rhizobiaceae</i>     | Unclassified           | MT112371.1 | 100%   | <i>Salaquimonas pukyongi</i>                               |
| 88 | <i>Pirellulaceae</i>    | <i>Blastopirellula</i> | KF364638.1 | 99.60% | Surface of macroalgae / <i>Sargassum muticum</i>           |
| 90 | <i>Rhodobacteraceae</i> | <i>Sulfitobacter</i>   | LR722698.1 | 100%   | Coastal marine surface water                               |
| 91 | <i>Pirellulaceae</i>    | <i>Blastopirellula</i> | KY278739.1 | 98.80% | Dinoflagellate <i>Cochlodinium</i>                         |
| 95 | <i>Rhodobacteraceae</i> | Unclassified           | MK100380.1 | 100%   | <i>Thalassobius</i> sp.                                    |
| 96 | <i>Pirellulaceae</i>    | <i>Blastopirellula</i> | KF185573.1 | 99.20% | Northern Adriatic Sea: Gulf of Trieste; marine snow sample |
| 97 | <i>Rhodobacteraceae</i> | <i>Sulfitobacter</i>   | MT012050.1 | 100%   | Phycosphere of <i>Prorocentrum donghaiense</i>             |
| 99 | <i>Rhodobacteraceae</i> | Unclassified           | GU451554.1 | 100%   | Macroalgal surface                                         |

---

**Table S12:** Results of analysis of variance (ANOVA) for the 50 most abundant amplicon sequence variants (ASV) of the *Hediste diversicolor* bacterial communities. Significant results ( $p < 0.01$ ) are highlighted. Resid.Dev: residual deviance; F:  $f$ -value; Pr(>F):  $p$ -value.

| ASV | Factor | Resid. Dev | F     | Pr(>F) |
|-----|--------|------------|-------|--------|
| 1   | Oil    | 92957.26   | 20.21 | 0.002  |
|     | pH     | 41984.87   | 11.66 | 0.009  |
|     | Oil*pH | 41977.42   | 0.00  | 0.968  |
| 2   | Oil    | 32321.79   | 3.06  | 0.118  |
|     | pH     | 26711.93   | 1.66  | 0.234  |
|     | Oil*pH | 26364.60   | 0.10  | 0.757  |
| 3   | Oil    | 37776.61   | 6.71  | 0.032  |
|     | pH     | 36972.36   | 0.20  | 0.663  |
|     | Oil*pH | 36558.09   | 0.11  | 0.754  |
| 4   | Oil    | 12131.35   | 0.11  | 0.748  |
|     | pH     | 11969.47   | 0.10  | 0.763  |
|     | Oil*pH | 11928.30   | 0.02  | 0.879  |
| 7   | Oil    | 31771.64   | 9.88  | 0.014  |
|     | pH     | 16317.80   | 9.98  | 0.013  |
|     | Oil*pH | 16317.80   | 0.00  | 1.000  |
| 8   | Oil    | 1158.30    | 11.63 | 0.009  |
|     | pH     | 1147.18    | 0.12  | 0.743  |
|     | Oil*pH | 1072.87    | 0.77  | 0.405  |
| 11  | Oil    | 6236.23    | 0.29  | 0.606  |
|     | pH     | 6141.82    | 0.11  | 0.748  |
|     | Oil*pH | 5264.27    | 1.03  | 0.341  |
| 12  | Oil    | 5915.10    | 4.08  | 0.078  |
|     | pH     | 5758.42    | 0.20  | 0.668  |
|     | Oil*pH | 5757.26    | 0.00  | 0.970  |
| 13  | Oil    | 11739.75   | 2.28  | 0.170  |
|     | pH     | 11711.72   | 0.02  | 0.897  |
|     | Oil*pH | 11707.05   | 0.00  | 0.958  |
| 17  | Oil    | 7338.19    | 3.36  | 0.104  |
|     | pH     | 7300.26    | 0.04  | 0.855  |
|     | Oil*pH | 7298.77    | 0.00  | 0.971  |
| 18  | Oil    | 776.43     | 15.69 | 0.004  |
|     | pH     | 463.21     | 7.35  | 0.027  |
|     | Oil*pH | 392.20     | 1.67  | 0.233  |
| 19  | Oil    | 1874.02    | 1.04  | 0.338  |
|     | pH     | 1595.58    | 10.75 | 0.011  |
|     | Oil*pH | 232.66     | 52.60 | <0.001 |
| 21  | Oil    | 9939.49    | 1.86  | 0.210  |
|     | pH     | 8260.51    | 1.62  | 0.239  |
|     | Oil*pH | 8175.62    | 0.08  | 0.782  |
| 22  | Oil    | 6611.09    | 8.71  | 0.018  |
|     | pH     | 5484.00    | 1.90  | 0.206  |
|     | Oil*pH | 5484.00    | 0.00  | 1.000  |

|    |        |         |       |        |
|----|--------|---------|-------|--------|
| 23 | Oil    | 9206.48 | 1.62  | 0.238  |
|    | pH     | 8296.36 | 0.90  | 0.370  |
|    | Oil*pH | 8241.22 | 0.05  | 0.821  |
| 24 | Oil    | 1143.23 | 0.02  | 0.879  |
|    | pH     | 1096.69 | 0.40  | 0.547  |
|    | Oil*pH | 789.92  | 2.61  | 0.145  |
| 25 | Oil    | 1286.28 | 0.03  | 0.856  |
|    | pH     | 840.51  | 3.96  | 0.082  |
|    | Oil*pH | 832.21  | 0.07  | 0.793  |
| 28 | Oil    | 1464.29 | 2.30  | 0.168  |
|    | pH     | 1397.15 | 0.67  | 0.435  |
|    | Oil*pH | 853.09  | 5.47  | 0.048  |
| 31 | Oil    | 2170.89 | 0.93  | 0.363  |
|    | pH     | 2169.63 | 0.00  | 0.956  |
|    | Oil*pH | 2085.56 | 0.21  | 0.657  |
| 34 | Oil    | 341.19  | 1.28  | 0.292  |
|    | pH     | 340.88  | 0.01  | 0.926  |
|    | Oil*pH | 281.11  | 1.79  | 0.217  |
| 39 | Oil    | 4286.94 | 3.61  | 0.094  |
|    | pH     | 4084.57 | 0.52  | 0.491  |
|    | Oil*pH | 2915.36 | 3.01  | 0.121  |
| 41 | Oil    | 1149.24 | 1.20  | 0.306  |
|    | pH     | 869.73  | 2.90  | 0.127  |
|    | Oil*pH | 851.89  | 0.19  | 0.678  |
| 42 | Oil    | 1401.55 | 0.93  | 0.362  |
|    | pH     | 1390.68 | 0.10  | 0.758  |
|    | Oil*pH | 772.69  | 5.78  | 0.043  |
| 44 | Oil    | 1032.39 | 0.87  | 0.379  |
|    | pH     | 778.21  | 4.64  | 0.063  |
|    | Oil*pH | 482.84  | 5.39  | 0.049  |
| 45 | Oil    | 680.22  | 2.95  | 0.124  |
|    | pH     | 161.73  | 32.48 | <0.001 |
|    | Oil*pH | 136.50  | 1.58  | 0.244  |
| 46 | Oil    | 1617.82 | 0.58  | 0.467  |
|    | pH     | 1422.30 | 2.42  | 0.159  |
|    | Oil*pH | 924.02  | 6.16  | 0.038  |
| 48 | Oil    | 968.63  | 0.39  | 0.550  |
|    | pH     | 605.09  | 10.33 | 0.012  |
|    | Oil*pH | 355.91  | 7.08  | 0.029  |
| 52 | Oil    | 946.38  | 4.21  | 0.074  |
|    | pH     | 743.80  | 3.89  | 0.084  |
|    | Oil*pH | 492.52  | 4.82  | 0.059  |
| 55 | Oil    | 520.79  | 4.29  | 0.072  |
|    | pH     | 314.43  | 6.22  | 0.037  |
|    | Oil*pH | 279.86  | 1.04  | 0.337  |
| 56 | Oil    | 1004.95 | 1.38  | 0.273  |

|     |        |         |       |       |
|-----|--------|---------|-------|-------|
|     | pH     | 980.32  | 0.27  | 0.616 |
|     | Oil*pH | 698.75  | 3.12  | 0.115 |
|     | Oil    | 1074.35 | 0.00  | 0.982 |
| 61  | pH     | 1027.32 | 0.29  | 0.604 |
|     | Oil*pH | 979.05  | 0.30  | 0.599 |
|     | Oil    | 1972.71 | 1.10  | 0.324 |
| 62  | pH     | 1911.68 | 0.32  | 0.586 |
|     | Oil*pH | 1296.83 | 3.24  | 0.110 |
|     | Oil    | 1985.05 | 0.07  | 0.791 |
| 64  | pH     | 1979.66 | 0.02  | 0.902 |
|     | Oil*pH | 1904.81 | 0.22  | 0.649 |
|     | Oil    | 727.76  | 6.27  | 0.037 |
| 72  | pH     | 201.75  | 26.14 | 0.001 |
|     | Oil*pH | 168.28  | 1.66  | 0.233 |
|     | Oil    | 739.61  | 1.58  | 0.244 |
| 74  | pH     | 640.14  | 1.32  | 0.284 |
|     | Oil*pH | 595.69  | 0.59  | 0.465 |
|     | Oil    | 703.79  | 0.55  | 0.479 |
| 77  | pH     | 488.98  | 5.32  | 0.050 |
|     | Oil*pH | 316.56  | 4.27  | 0.073 |
|     | Oil    | 818.70  | 2.21  | 0.175 |
| 80  | pH     | 622.28  | 3.01  | 0.121 |
|     | Oil*pH | 592.14  | 0.46  | 0.516 |
|     | Oil    | 1792.48 | 0.10  | 0.760 |
| 81  | pH     | 1769.72 | 0.32  | 0.585 |
|     | Oil*pH | 486.43  | 18.20 | 0.003 |
|     | Oil    | 1154.19 | 0.17  | 0.695 |
| 82  | pH     | 977.69  | 1.16  | 0.314 |
|     | Oil*pH | 949.99  | 0.18  | 0.681 |
|     | Oil    | 6086.47 | 9.19  | 0.016 |
| 89  | pH     | 3170.80 | 9.40  | 0.015 |
|     | Oil*pH | 3170.80 | 0.00  | 1.000 |
|     | Oil    | 671.69  | 4.54  | 0.066 |
| 92  | pH     | 428.17  | 5.48  | 0.047 |
|     | Oil*pH | 402.04  | 0.59  | 0.465 |
|     | Oil    | 1517.30 | 0.27  | 0.620 |
| 93  | pH     | 1474.76 | 0.89  | 0.373 |
|     | Oil*pH | 621.94  | 17.88 | 0.003 |
|     | Oil    | 1004.50 | 0.43  | 0.532 |
| 98  | pH     | 914.55  | 2.08  | 0.188 |
|     | Oil*pH | 362.45  | 12.75 | 0.007 |
|     | Oil    | 741.06  | 0.16  | 0.696 |
| 102 | pH     | 684.25  | 2.06  | 0.189 |
|     | Oil*pH | 213.05  | 17.12 | 0.003 |
|     | Oil    | 1172.53 | 5.00  | 0.056 |
| 105 | pH     | 1006.42 | 1.09  | 0.328 |

|     |        |         |       |       |
|-----|--------|---------|-------|-------|
| 107 | Oil*pH | 924.53  | 0.54  | 0.485 |
|     | Oil    | 969.34  | 11.67 | 0.009 |
|     | pH     | 366.82  | 17.75 | 0.003 |
|     | Oil*pH | 361.59  | 0.15  | 0.705 |
| 110 | Oil    | 923.54  | 0.11  | 0.747 |
|     | pH     | 802.18  | 3.60  | 0.094 |
|     | Oil*pH | 326.88  | 14.10 | 0.006 |
|     | Oil    | 4649.10 | 3.92  | 0.083 |
| 113 | pH     | 3819.64 | 1.72  | 0.226 |
|     | Oil*pH | 3819.64 | 0.00  | 1.000 |
|     | Oil    | 546.84  | 0.01  | 0.933 |
|     | pH     | 434.52  | 10.80 | 0.011 |
| 116 | Oil*pH | 118.72  | 30.36 | 0.001 |
|     | Oil    | 682.70  | 1.31  | 0.286 |
|     | pH     | 632.36  | 1.52  | 0.253 |
|     | Oil*pH | 304.69  | 9.88  | 0.014 |
| 121 |        |         |       |       |

**Table S13:** Results of analysis of variance for the 50 most abundant amplicon sequence variants (ASVs) of the *Peringia ulvae* bacterial communities. Significant results ( $p < 0.01$ ) are highlighted. Resid.Dev: residual deviance; F:  $f$ -value; Pr(>F):  $p$ -value.

| ASV | Factor | Resid. Dev | F     | Pr(>F) |
|-----|--------|------------|-------|--------|
| 5   | Oil    | 1353.02    | 0.26  | 0.628  |
|     | pH     | 803.71     | 3.94  | 0.094  |
| 6   | Oil    | 559.34     | 31.02 | 0.001  |
|     | pH     | 477.75     | 1.01  | 0.353  |
| 8   | Oil    | 1890.16    | 1.31  | 0.295  |
|     | pH     | 1824.74    | 0.18  | 0.684  |
| 10  | Oil    | 3062.76    | 19.66 | 0.004  |
|     | pH     | 972.73     | 13.00 | 0.011  |
| 14  | Oil    | 1864.91    | 0.24  | 0.644  |
|     | pH     | 1772.16    | 0.32  | 0.590  |
| 15  | Oil    | 847.14     | 0.22  | 0.655  |
|     | pH     | 449.65     | 5.98  | 0.050  |
| 16  | Oil    | 1325.18    | 3.36  | 0.117  |
|     | pH     | 1322.80    | 0.01  | 0.923  |
| 18  | Oil    | 464.30     | 0.64  | 0.454  |
|     | pH     | 447.33     | 0.23  | 0.650  |
| 20  | Oil    | 1510.39    | 1.89  | 0.219  |
|     | pH     | 1133.82    | 2.33  | 0.177  |
| 26  | Oil    | 1986.59    | 0.10  | 0.768  |
|     | pH     | 1942.10    | 0.16  | 0.705  |
| 27  | Oil    | 4553.31    | 6.63  | 0.042  |
|     | pH     | 1861.64    | 10.23 | 0.019  |
| 29  | Oil    | 642.25     | 13.49 | 0.010  |
|     | pH     | 490.15     | 2.14  | 0.194  |
| 30  | Oil    | 792.17     | 0.53  | 0.496  |
|     | pH     | 755.80     | 0.26  | 0.627  |
| 32  | Oil    | 2127.24    | 12.28 | 0.013  |
|     | pH     | 1306.95    | 3.50  | 0.111  |
| 33  | Oil    | 1021.64    | 38.21 | 0.001  |
|     | pH     | 1021.64    | 0.00  | 1.000  |
| 36  | Oil    | 4171.00    | 0.77  | 0.414  |
|     | pH     | 2861.86    | 3.04  | 0.132  |
| 38  | Oil    | 181.42     | 0.44  | 0.533  |
|     | pH     | 163.48     | 0.72  | 0.430  |
| 40  | Oil    | 332.46     | 1.24  | 0.308  |
|     | pH     | 305.13     | 0.49  | 0.509  |
| 43  | Oil    | 711.98     | 12.38 | 0.013  |
|     | pH     | 571.84     | 1.64  | 0.247  |
| 49  | Oil    | 6379.47    | 7.50  | 0.034  |
|     | pH     | 2702.64    | 10.48 | 0.018  |
| 50  | Oil    | 1079.83    | 0.13  | 0.731  |
|     | pH     | 1074.12    | 0.03  | 0.870  |

|    |     |         |       |       |
|----|-----|---------|-------|-------|
| 51 | Oil | 981.12  | 10.61 | 0.017 |
|    | pH  | 579.19  | 4.22  | 0.086 |
| 53 | Oil | 2480.65 | 0.70  | 0.434 |
|    | pH  | 1126.44 | 8.58  | 0.026 |
| 54 | Oil | 980.90  | 0.88  | 0.385 |
|    | pH  | 875.13  | 0.83  | 0.397 |
| 57 | Oil | 2076.00 | 19.53 | 0.004 |
|    | pH  | 2076.00 | 0.00  | 1.000 |
| 58 | Oil | 788.65  | 2.17  | 0.191 |
|    | pH  | 264.79  | 11.59 | 0.014 |
| 59 | Oil | 1604.22 | 3.26  | 0.121 |
|    | pH  | 985.07  | 4.49  | 0.078 |
| 60 | Oil | 1300.91 | 0.16  | 0.700 |
|    | pH  | 978.86  | 2.15  | 0.193 |
| 63 | Oil | 796.26  | 22.28 | 0.003 |
|    | pH  | 691.22  | 1.02  | 0.352 |
| 65 | Oil | 4284.73 | 3.29  | 0.120 |
|    | pH  | 3167.40 | 2.48  | 0.166 |
| 66 | Oil | 851.32  | 18.79 | 0.005 |
|    | pH  | 622.46  | 2.94  | 0.137 |
| 67 | Oil | 253.07  | 1.33  | 0.293 |
|    | pH  | 243.68  | 0.27  | 0.620 |
| 68 | Oil | 784.42  | 23.24 | 0.003 |
|    | pH  | 394.89  | 6.23  | 0.047 |
| 70 | Oil | 837.25  | 3.82  | 0.099 |
|    | pH  | 836.45  | 0.01  | 0.935 |
| 75 | Oil | 2353.24 | 0.00  | 0.966 |
|    | pH  | 1461.81 | 5.06  | 0.065 |
| 76 | Oil | 1352.55 | 0.65  | 0.451 |
|    | pH  | 1352.29 | 0.00  | 0.972 |
| 78 | Oil | 1202.14 | 7.37  | 0.035 |
|    | pH  | 1173.05 | 0.15  | 0.711 |
| 79 | Oil | 708.57  | 0.38  | 0.560 |
|    | pH  | 606.05  | 1.09  | 0.337 |
| 83 | Oil | 4180.05 | 6.95  | 0.039 |
|    | pH  | 1475.52 | 14.76 | 0.009 |
| 84 | Oil | 350.54  | 14.67 | 0.009 |
|    | pH  | 350.40  | 0.00  | 0.963 |
| 85 | Oil | 859.11  | 4.21  | 0.086 |
|    | pH  | 758.72  | 0.87  | 0.387 |
| 86 | Oil | 2167.65 | 12.16 | 0.013 |
|    | pH  | 2167.65 | 0.00  | 1.000 |
| 87 | Oil | 567.74  | 35.00 | 0.001 |
|    | pH  | 172.27  | 15.88 | 0.007 |
| 88 | Oil | 242.36  | 20.12 | 0.004 |
|    | pH  | 241.50  | 0.02  | 0.883 |

|    |     |         |       |       |
|----|-----|---------|-------|-------|
| 90 | Oil | 750.71  | 0.00  | 0.964 |
|    | pH  | 437.44  | 4.45  | 0.079 |
| 91 | Oil | 546.93  | 15.54 | 0.008 |
|    | pH  | 546.85  | 0.00  | 0.975 |
| 95 | Oil | 3630.68 | 0.60  | 0.467 |
|    | pH  | 3215.73 | 0.85  | 0.393 |
| 96 | Oil | 696.91  | 25.81 | 0.002 |
|    | pH  | 360.42  | 6.44  | 0.044 |
| 97 | Oil | 1443.60 | 3.12  | 0.128 |
|    | pH  | 490.97  | 14.21 | 0.009 |
| 99 | Oil | 634.10  | 23.00 | 0.003 |
|    | pH  | 399.85  | 3.66  | 0.104 |



**Table S14:** Results of the permutational analysis of variance (PERMANOVA) for the polychaete (*Hediste diversicolor*) biochemical markers. Coef: coefficient; Df: degrees of freedom; SumsOfSqs: sum of squares; MeanSqs: mean squares; F: *f*-value; P: *p*-value; AChE: acetylcholinesterase; LDH: lactate dehydrogenase; CAT: catalase; GST: glutathione *S*-transferase; LPO: lipid peroxidation; E<sub>a</sub>: Energy available; E<sub>c</sub>: Energy consumption; CEA: cellular energy allocation.

| Model  | Coef      | Df | SumsOfSqs | MeanSqs | F      | R <sup>2</sup> | P     | Sig |
|--------|-----------|----|-----------|---------|--------|----------------|-------|-----|
| AChE   | pH        | 1  | 0.012     | 0.012   | 0.233  | 0.037          | 0.658 |     |
|        | Residuals | 6  | 0.311     | 0.0519  |        | 0.963          |       |     |
|        | Total     | 7  | 0.323     |         |        | 1.000          |       |     |
| LDH    | pH        | 1  | 0.002     | 0.002   | 0.021  | 0.003          | 0.879 |     |
|        | Residuals | 6  | 0.463     | 0.077   |        | 0.997          |       |     |
|        | Total     | 7  | 0.46445   |         |        | 1.000          |       |     |
| CAT    | pH        | 1  | 0.008     | 0.008   | 0.0721 | 0.012          | 0.848 |     |
|        | Residuals | 6  | 0.669     | 0.112   |        | 0.988          |       |     |
|        | Total     | 7  | 0.677     |         |        | 1.000          |       |     |
| GST    | pH        | 1  | 0.004     | 0.004   | 0.075  | 0.012          | 0.717 |     |
|        | Residuals | 6  | 0.324     | 0.054   |        | 0.988          |       |     |
|        | Total     | 7  | 0.328     |         |        | 1.000          |       |     |
| LPO    | pH        | 1  | 0.002     | 0.002   | 0.050  | 0.008          | 0.866 |     |
|        | Residuals | 6  | 0.257     | 0.043   |        | 0.992          |       |     |
|        | Total     | 7  | 0.259     |         |        | 1.000          |       |     |
| Lipids | pH        | 1  | 0.068     | 0.068   | 0.461  | 0.072          | 0.575 |     |
|        | Residuals | 6  | 0.886     | 0.148   |        | 0.929          |       |     |

|                      |           |   |       |       |       |       |       |
|----------------------|-----------|---|-------|-------|-------|-------|-------|
|                      | Total     | 7 | 0.954 |       |       | 1.000 |       |
| <b>Carbohydrates</b> | pH        | 1 | 0.115 | 0.115 | 0.629 | 0.095 | 0.436 |
|                      | Residuals | 6 | 1.099 | 0.183 |       | 0.905 |       |
|                      | Total     | 7 | 1.215 |       |       | 1.000 |       |
| <b>Proteins</b>      | pH        | 1 | 0.001 | 0.001 | 0.004 | 0.001 | 0.981 |
|                      | Residuals | 6 | 0.909 | 0.151 |       | 0.999 |       |
|                      | Total     | 7 | 0.909 |       |       | 1.000 |       |
| <b>E<sub>a</sub></b> | pH        | 1 | 0.005 | 0.005 | 0.038 | 0.006 | 0.829 |
|                      | Residuals | 6 | 0.807 | 0.135 |       | 0.994 |       |
|                      | Total     | 7 | 0.813 |       |       | 1.000 |       |
| <b>E<sub>c</sub></b> | pH        | 1 | 0.022 | 0.022 | 0.219 | 0.035 | 0.636 |
|                      | Residuals | 6 | 0.603 | 0.101 |       | 0.965 |       |
|                      | Total     | 7 | 0.625 |       |       | 1.000 |       |
| <b>CEA</b>           | pH        | 1 | 0.164 | 0.164 | 0.764 | 0.113 | 0.454 |
|                      | Residuals | 6 | 1.290 | 0.215 |       | 0.887 |       |
|                      | Total     | 7 | 1.455 |       |       | 1.000 |       |

**Table S15:** Results of permutational multivariate analysis of variance (PERMANOVA) for the gastropod (*Peringia ulvae*) biochemical parameters. Coef: coefficient; Df: degrees of freedom; SumsOfSqs: sum of squares; MeanSqs: mean squares; F: *f*-value; P: *p*-value; AChE: acetylcholinesterase; LDH: lactate dehydrogenase; CAT: catalase; GST: glutathione *S*-transferase; LPO: lipid peroxidation; E<sub>a</sub>: Energy available; E<sub>c</sub>: Energy consumption; CEA: cellular energy allocation.

| Model  | Coef      | Df | SumsOfSqs | MeanSqs | F     | R <sup>2</sup> | P     | Sig |
|--------|-----------|----|-----------|---------|-------|----------------|-------|-----|
| AChE   | Oil       | 1  | 0.024     | 0.024   | 0.685 | 0.064          | 0.421 |     |
|        | pH        | 1  | 0.037     | 0.037   | 1.047 | 0.098          | 0.324 |     |
|        | Residuals | 9  | 0.319     | 0.035   |       | 0.839          |       |     |
|        | Total     | 11 | 0.380     |         |       | 1.000          |       |     |
| LDH    | Oil       | 1  | 0.638     | 0.638   | 8.664 | 0.490          | 0.019 | *   |
|        | pH        | 1  | 0.002     | 0.002   | 0.026 | 0.001          | 0.863 |     |
|        | Residuals | 9  | 0.663     | 0.074   |       | 0.509          |       |     |
|        | Total     | 11 | 1.303     |         |       | 1.000          |       |     |
| CAT    | Oil       | 1  | 0.012     | 0.012   | 1.050 | 0.064          | 0.335 |     |
|        | pH        | 1  | 0.073     | 0.073   | 6.405 | 0.389          | 0.022 | *   |
|        | Residuals | 9  | 0.103     | 0.011   |       | 0.547          |       |     |
|        | Total     | 11 | 0.188     |         |       | 1.000          |       |     |
| GST    | Oil       | 1  | 0.000     | 0.000   | 0.019 | 0.002          | 0.885 |     |
|        | pH        | 1  | 0.005     | 0.005   | 0.634 | 0.066          | 0.441 |     |
|        | Residuals | 9  | 0.074     | 0.008   |       | 0.932          |       |     |
|        | Total     | 11 | 0.080     |         |       | 1.000          |       |     |
| LPO    | Oil       | 1  | 0.883     | 0.883   | 7.180 | 0.437          | 0.026 | *   |
|        | pH        | 1  | 0.029     | 0.029   | 0.233 | 0.014          | 0.648 |     |
|        | Residuals | 9  | 1.107     | 0.123   |       | 0.548          |       |     |
|        | Total     | 11 | 2.018     |         |       | 1.000          |       |     |
| Lipids | Oil       | 1  | 0.568     | 0.568   | 6.502 | 0.412          | 0.011 | *   |

|                |           |    |       |       |        |       |       |    |
|----------------|-----------|----|-------|-------|--------|-------|-------|----|
|                | pH        | 1  | 0.023 | 0.023 | 0.261  | 0.017 | 0.646 |    |
|                | Residuals | 9  | 0.786 | 0.087 |        | 0.571 |       |    |
|                | Total     | 11 | 1.377 |       |        | 1.000 |       |    |
| Carbohydrates  | Oil       | 1  | 0.028 | 0.028 | 0.811  | 0.045 | 0.401 |    |
|                | pH        | 1  | 0.287 | 0.287 | 8.338  | 0.459 | 0.017 | *  |
|                | Residuals | 9  | 0.310 | 0.034 |        | 0.496 |       |    |
|                | Total     | 11 | 0.625 |       |        | 1.000 |       |    |
| Proteins       | Oil       | 1  | 0.335 | 0.335 | 3.494  | 0.260 | 0.103 |    |
|                | pH        | 1  | 0.091 | 0.091 | 0.947  | 0.070 | 0.364 |    |
|                | Residuals | 9  | 0.862 | 0.096 |        | 0.670 |       |    |
|                | Total     | 11 | 1.287 |       |        | 1.000 |       |    |
| E <sub>a</sub> | Oil       | 1  | 0.219 | 0.219 | 3.381  | 0.272 | 0.093 |    |
|                | pH        | 1  | 0.003 | 0.003 | 0.048  | 0.004 | 0.873 |    |
|                | Residuals | 9  | 0.583 | 0.065 |        | 0.724 |       |    |
|                | Total     | 11 | 0.805 |       |        | 1.000 |       |    |
| E <sub>c</sub> | Oil       | 1  | 0.050 | 0.050 | 2.414  | 0.211 | 0.181 |    |
|                | pH        | 1  | 0.000 | 0.000 | 0.023  | 0.002 | 0.876 |    |
|                | Residuals | 9  | 0.187 | 0.021 |        | 0.787 |       |    |
|                | Total     | 11 | 0.238 |       |        | 1.000 |       |    |
| CEA            | Oil       | 1  | 0.553 | 0.553 | 20.353 | 0.693 | 0.002 | ** |
|                | pH        | 1  | 0.001 | 0.001 | 0.027  | 0.001 | 0.878 |    |
|                | Residuals | 9  | 0.245 | 0.027 |        | 0.306 |       |    |
|                | Total     | 11 | 0.798 |       |        | 1.000 |       |    |

Note: \* P < 0.05; \*\* P < 0.01

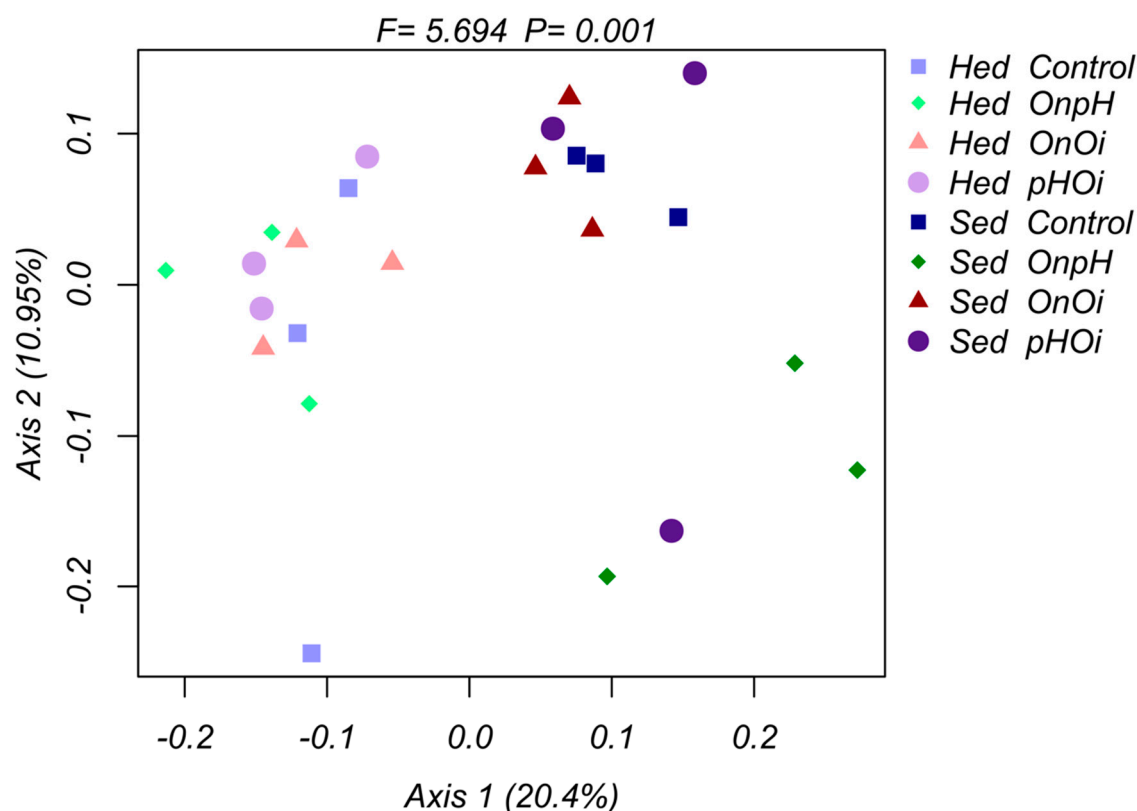

**Figure S1.** Principal Coordinates Analysis (PCoA) of sediment and polychaete (*Hediste diversicolor*)-associated bacterial DGGE profiles. The first two explanatory axes are shown. Hed: polychaete *H. diversicolor*; Sed: Sediment; Control: control treatment, i.e., without oil and with normal pH; OnpH: only pH treatment, i.e., without oil and with reduced seawater pH; OnOi: only oil treatment, i.e., with oil and with normal seawater pH; pHOi: pH and oil treatment, i.e., with oil and with reduced seawater pH. The permutational multivariate analysis of variance (PERMANOVA) results of the comparison between sediment and polychaete DGGE profiles are shown above (F: *f*-value; P: *p*-value).

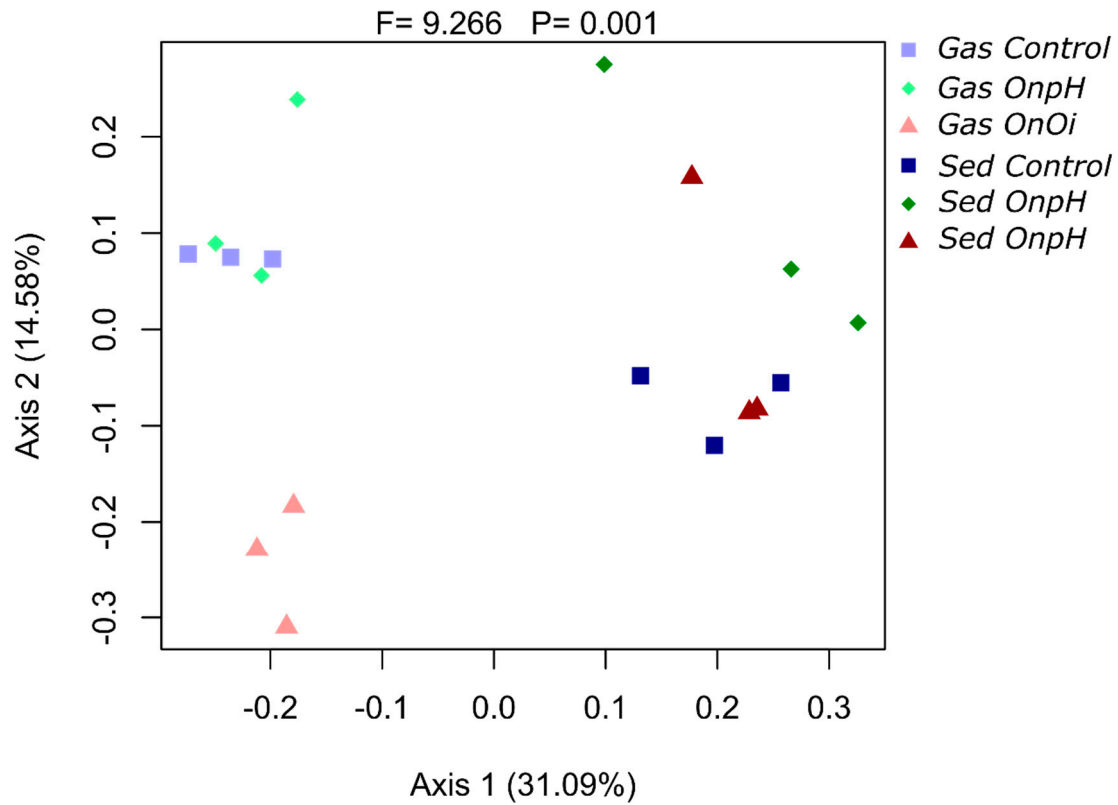

**Figure S2.** Principal Coordinates Analysis (PCoA) of sediment and gastropod (*Peringia ulvae*)-associated bacterial DGGE profiles. The first two explanatory axes are shown. Gas: gastropod *P. ulvae*; Sed: Sediment; Control: control treatment, i.e., without oil and with normal pH; OnpH: only pH treatment, i.e., without oil and with reduced seawater pH; OnOi: only oil treatment, i.e., with oil and with normal seawater pH; pHOi: pH and oil treatment, i.e., with oil and with reduced seawater pH. The permutational multivariate analysis of variance (PERMANOVA) results of the comparison between sediment and gastropod DGGE profiles are shown above (F:  $f$ -value; P:  $p$ -value).

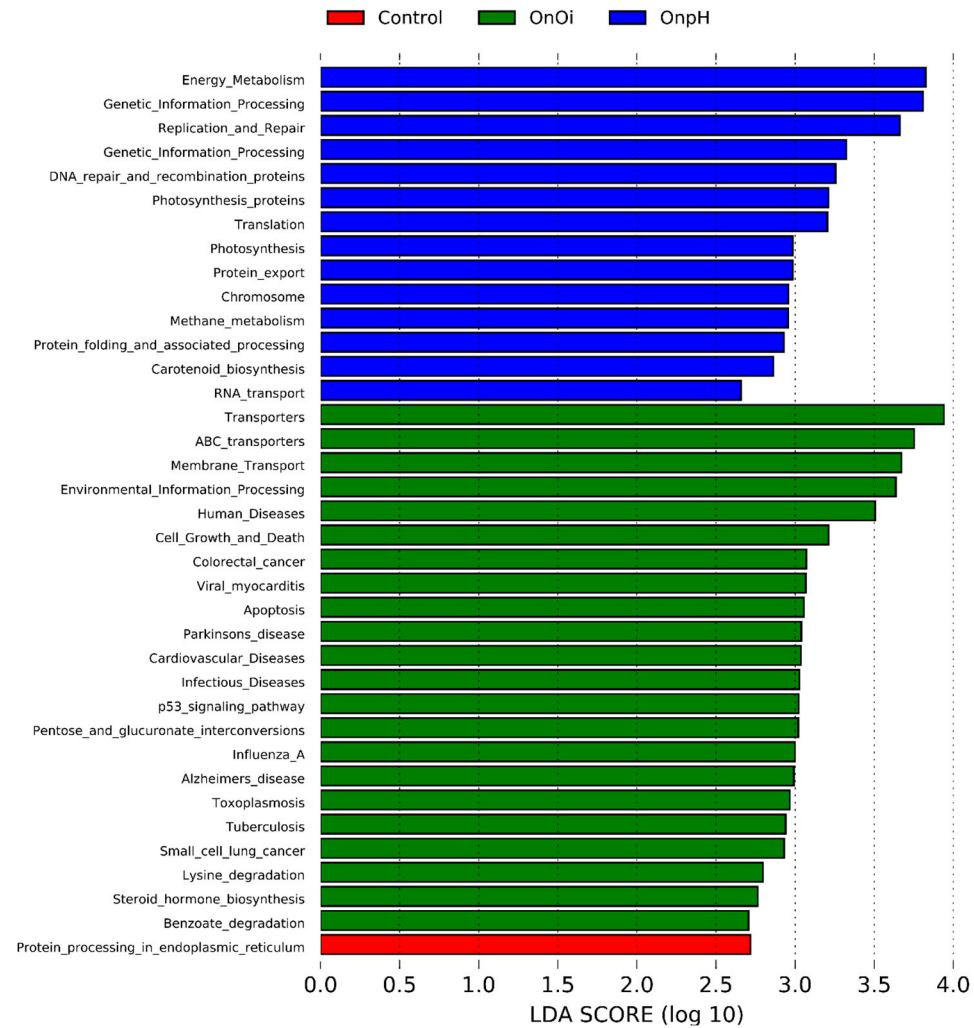

**Figure S3.** Results from LefSe of predicted metagenome of bacterial communities associated with the polychaete *Hediste diversicolor*. Control: control treatment, i.e., without oil and with normal pH; OnpH: only pH treatment, i.e., without oil and with reduced seawater pH; OnOi: only oil treatment, i.e., with oil and with normal seawater pH.

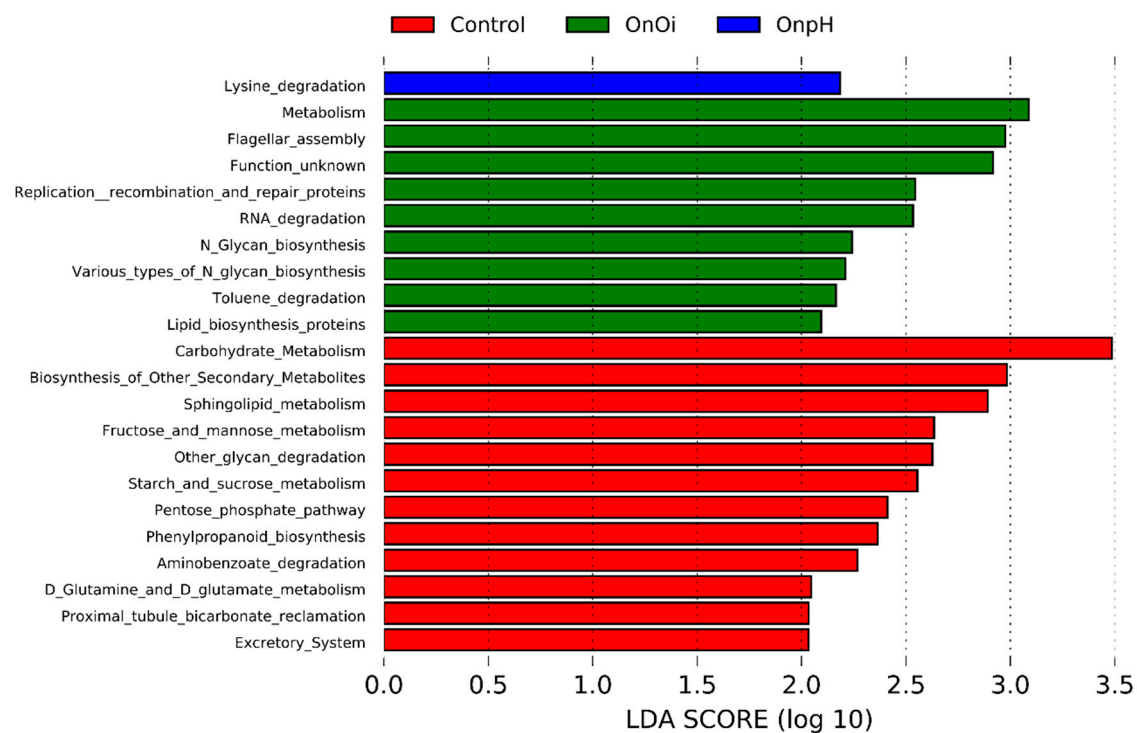

**Figure S4.** Results from LefSe of predicted metagenome of bacterial communities associated with the gastropod *Peringia ulvae*. Control: control treatment, i.e., without oil and with normal pH; OnpH: Only pH treatment, i.e., without oil and with reduced seawater pH; OnOi: only oil treatment, i.e., with oil and with normal seawater pH



## References

- Altschul, S.F., Gish, W., Miller, W., Myers, E.W., Lipman, D.J., 1990. Basic Local Alignment Search Tool. *J Mol Biol* 215, 403–410.
- Bradford, M.M., 1976. A rapid and sensitive method for the quantitation of microgram quantities of protein utilizing the principle of protein-dye binding. *Anal. Biochem.* 72, 248–254.
- Clairborne, A., 1985. Catalase activity. In *handbook of method for oxygen radical research*. Green world, RA ed.
- Cravo-Laureau, C., Jézéquel, R., Gilbert, F., Cuny, P., Duran, R., 2017. Mudflat Benthic Spill Simulations BT - Hydrocarbon and Lipid Microbiology Protocols: Meso- and Microcosms, in: McGenity, T.J., Timmis, K.N., Nogales, B. (Eds.), . Springer Berlin Heidelberg, Berlin, Heidelberg, pp. 79–89. [https://doi.org/10.1007/8623\\_2015\\_52](https://doi.org/10.1007/8623_2015_52)
- De Coen, W.M., Janssen, C.R., 2003. The missing biomarker link: Relationships between effects on the cellular energy allocation biomarker of toxicant-stressed *Daphnia magna* and corresponding population characteristics. *Environ. Toxicol. Chem. An Int. J.* 22, 1632–1641.
- Diamantino, T.C., Almeida, E., Soares, A.M.V.M., Guilhermino, L., 2001. Lactate dehydrogenase activity as an effect criterion in toxicity tests with *Daphnia magna* straus. *Chemosphere* 45, 553–560.
- Dunn, P.K., 2017. Tweedie: Evaluation of Tweedie exponential family models. R Packag. version 2.
- Ellman, G.L., Courtney, K.D., Andres Jr, V., Featherstone, R.M., 1961. A new and rapid colorimetric determination of acetylcholinesterase activity. *Biochem. Pharmacol.* 7, 88–95.
- Habig, W.H., Pabst, M.J., Jakoby, W.B., 1974. Glutathione S-transferases: the first enzymatic step in mercapturic acid formation. *J. Biol. Chem.* 249, 7130–7139.
- McMurdie, P.J., Holmes, S., 2013. phyloseq: An R package for reproducible interactive analysis and graphics of microbiome census data. *PLoS One* 8, e61217. <https://doi.org/10.1371/journal.pone.0061217>
- Ohkawa, H., Ohishi, N., Yagi, K., 1979. Assay for lipid peroxides in animal tissues by thiobarbituric acid reaction. *Anal. Biochem.* 95, 351–358.
- R Core Team, 2020. R Core Team R: a language and environment for statistical computing. Found. Stat. Comput.
- Vassault, A., 1983. Lactate dehydrogenase, UV-method with pyruvate and NADH. *Methods Enzym. Anal.* 3, 118.
- Verslycke, T., Vercauteren, J., Devos, C., Moens, L., Sandra, P., Janssen, C.R., 2003. Cellular energy allocation in the estuarine mysid shrimp *Neomysis integer* (Crustacea: Mysidacea) following tributyltin exposure. *J. Exp. Mar. Bio. Ecol.* 288, 167–179.

## Supplementary Dataset S2

>241cd968e7930f0a4b0cdd1bcfcb72e5

ttccagctccaatagcgtatatttaagttgttgacgttaaaaagctcgtagttggaccttgggatgggtcgatcgggtccgccttacggtgtgaaccggtcg  
tctcgctccttctaccggcgatgcgctcctagccttaactggccgggtcgctcctccggtgctgttactttgaagaaattagagtgtcaaagcaagccta  
cgctctggatacattagcatgggataacatcataggaatttcggtccta

>f900b8173361f6103f0748bbb2b63e6b

ttccagctccaatagcgtatattaaagttgttgccgttaaaaagctcgtagttgaactttggctcctggctgatctgtcctcctaatacgagcgcacggattcg  
gtcgggacttttcttctggggagcccgatgccctttactgggctcgtggggaaccaggactttaccttgaaaaaattagagtgtcaaagcaggccttt  
gctcgaatacattagcatggaataatagaataggacatcggttctat

>1552ec8731eca7b1e9c14c0a1111f410

tacgtagggtgcaagcgtaatacgggaattactgggcgtaaagcgtgcgcaggcggtaatgtaagacagatgtgaaatccccgggctcaacctgggaac  
tgcatttgtgactgcattgctggagtcggcagagggggatggaattccgctgtagcagtgaaatgcgtagatatgcggaggaacaccgatggcgaa  
ggcaatccccgggctgcactgacgctcatgcacgaaagcgtggggagcaaac

>bb03e6ea99adcfcb8083ec2c9af114fb

tacgtagggtgcgagcgttgcggatttattgggcgtaaagggctcgtaggtgggtgatcgcgtcggaagtgtaatcttggggcttaacctgagcgtg  
ctttcgatacgggtgacttgaggaaggtaggggagaatggaattcctgggtggagcgggtggaatgcgcagatatcaggaggaacaccagtggcgaa  
gcggttctctgggccttctgacgctgaggagcgaaagcgtggggagcgaac

>d23fbef2f31d48eda40876cdb49933a

tacgtagggtggaagcgttatccggaattattgggcgtaaagcgcgcgtaggcgggtttttaagctgatgtgaaagcccacggctcaacctggaggg  
tcattgaaaactgaaaaacttgagtgcagaagaggaaagtggaattccatgtgtagcgggtgaaatgcgcagagatatggaggaacaccagtggcgaa  
ggcgactttctggtctgtaactgacgctgatgtgcgaaagcgtggggatcaaac

>81d3e3ada3888e87d560394e7ae7d306

ttccagctccaatagcgtatattaaagttgttgacgttaaaaagctcgtagttgaacttcagatctggttgccttgggtccgcctcacggtgtgtactgaatga  
ccggatcttacctcttggtagccagcatgtcgtttactcggcgtgttggggaaccaggattttactttgaaaaaattagagtgtcaaagcaggcctat  
gcccgaatacattagcatggaataatagaataggacgtgcggttcta

>cacdadcf5b14a3983b66642bc506648

tacggagggtgtagcgttattcggaattactgggcgtaaagcgcgcgtaggcggctttgtaagtaagaggtgaaagcctggtgctcaacgccagaac  
tgccttttagactgcacgcttgaatccaggagaggtgagtggaattccgagtgtagaggtgaaattcgtagatattcggaagaacaccagtggcgaa  
gcggctcactggactggtattgacgctgaggtgcgaaagcgtggggagcaaac

>8f09bac714c02dc9415770271349dc99

tacagagggtgcaagcgttaatacgggaattactgggcgtaaagcgcgcgtaggtgggttgttaagttggatgtgaaatccccgggctcaacctgggaact  
gcattcaaaactgactgactagagtatggtagagggtggtggaatttctgtgtagcgggtgaaatgcgtagatataggaaggaacaccagtggcgaa  
gcgaccacctggactaatactgacactgaggtgcgaaagcgtggggagcaaac

>dc5030eb18fe395a50b8235f2e583dbd

tacagagggtgcaagcgttaatacgggaattactgggcgtaaagcgcgcgtaggtgggttcgttaagttggatgtgaaatccccgggctcaacctgggaact  
gcattcaaaactgtcgagctagagtatggtagagggtggtggaatttctgtgtagcgggtgaaatgcgtagatataggaaggaacaccagtggcgaa  
gcgaccacctggactgatactgacactgaggtgcgaaagcgtggggagcaaac

>56451274fe5860fc4bec31048c3da891

ttccagctccaatagcgtatcttaaagttgctgcagttaaaaagctcgtagttggatctcgggatcgcagctgacgggtccgccgcgaggcgagctaccgtc  
tgcccagcccctgcctctcggcgccccctcgcgtcttagctgagtgctccgcgggggtccgaagcgtttactttgaaaaaattagagtgttcaaagcag  
gcccggtcgcctgaataccgcagctaggaataatggaataggactccgg

>f3daba50a1d4c1e136be721f87036b6e

tacggagggtgcaagcgttatccggattcactgggtttaaagggtgcgtaggtgggtttgtaagtccgtggtgaaatctccaagcttaacttgaaactg  
ccatggatactataaatcttgaaggacgtggaggtagcggaatatgtcatgtagcggtgaaatgcttagatatgacatagaacaccaattgcgaagg  
cagctcactacccgtttattgacactgaggcacgaaagcgtggggatcaaac

>e43878b615db002228617a85b4e5ff25

ttccagctccaatagcgtatattaaagttgttcagttaaaaagctcgtagtcggatctgaggcgccggcgggcggtccctcttcgcgagggtctactgc  
ccgctccggccctgaccgcggcgagcgccgggtgcccttgactgggtgcgggcagcgccggaacgtttactttgaagaaattagagtgttcaagg  
caggcgggttcgcctgaatggtggtgcatggaataatggaacaggaccccggt

>41378f74d12fa986976885b63c8abe9c

tacggagggtgcgagcgtgtccggaatcattgggcgtaaaggcgctaggtggccgggtaagcgtgcggtgaaagctcggggtcaaccccggt  
cggccgtgcgaactactgggtggagcactgtagaggcaggcggaattccgggtgtagcggtggaatgcgtagagatccggaagaacaccggtggc  
gaaggcggcctgctgggcagttgctgacactgaggcgcgacagcgtggggagcaaac

>9300f96e4700122e2126eebf4d8caf2

tacagagggtgcgagcgttaatcggatttactgggcgtaaagcgtgcgtagggcgccaattaagtcaaatgtgaaatccccgagcttaacttggaatt  
gcattcgatactgggtggctagagtatgggagaggatggtagaattccaggtgtagcggtgaaatgcgtagagatctggaggaataccgatggcgaag  
gcagccatctggcctaatactgacgctgaggtacgaaagcatggggagcaaac

>6c891abaa8f2147383dd332e601800eb

tacgtagggtgcgagcgttatccggaattattgggcgtaaagagctcgtagggcggtttgtcgcgtctgtcgtgaaagtcgggggttaaccccgatctg  
cggtaggtacgggcagactagagtgcagtaggggagactggaattcctggtgtagcggtggaatgcgcagatatcaggaggaacaccgatggcgaa  
ggcaggtctctgggctgtaactgacgctgaggagcgaaagcatggggagcgaaac

>6714a477209a04d2847b2c704a7a8bb8

tacggagggtgcgagcgttaatcgggaattactgggcgtaaagcgcagtcagggcgtctgttaagcaagatgtgaaagccccgggcttaacctgggaac  
cgcattttgaactggcaggctagagtctttagaggggggtagaatttcaggtgtagcggtgaaatgcgtagagatctgaaggaataccggtggcgaa  
ggcggccccctggacaaaactgacgctcagatgcgaaagcgtggggagcaaac

>c88fbf1faeb5a15f6c0ed3b0b17fe9d2

tacggagggggttagcgttgttcggaattactgggcgtaaagcgcacgtagggcggtatcagaaagtatagggtgaaatcccagggtcaacctggaa  
ctgccttgtaactcctggtcttgagttcgagagaggtgagtggaattccaggtgtagaggtgaaatcgtagatattcggaggaacaccagtgggcgaa  
ggcggctcactggctcgatactgacgctgaggtgcgaaagtgtggggagcaaac
